# Supplementary material
Source: PubMed Central journal article supplement (PMC4720563)
Supplement: NIHMS714490-supplement-10519_2015_9734_MOESM2_ESM.pdf [file NIHMS714490-supplement-10519_2015_9734_MOESM2_ESM.pdf]

Applying novel methods for assessing individual- and neighborhood-level social and psychosocial environment interactions with genetic factors in the prediction of depressive symptoms in the Multi-Ethnic Study of Atherosclerosis. *Behavior Genetics*. Erin B. Ware, Jennifer A. Smith, Bhramar Mukherjee, Seunggeun Lee, Sharon L. R. Kardia, Ana V. Diez-Roux

**Corresponding author:** Erin Ware<sup>1,2</sup>

**Email:** ebakshis@umich.edu

<sup>1</sup>Institute for Social Research, University of Michigan, Ann Arbor, MI

<sup>2</sup>Department of Epidemiology, School of Public Health, University of Michigan, Ann Arbor, MI

## Online Resource 2

**Region information for the 47 regions identified from the individual-SNP based GWAS of averaged depressive symptom score in the Multi-Ethnic Study of Atherosclerosis(Ware et al., 2015)**

| Region | Index SNP     | chr:Region start/stop position (bp) | Coded Allele | Discovery Ethnicity |           |    |                   | Meta p-value, Averaged CES-D |
|--------|---------------|-------------------------------------|--------------|---------------------|-----------|----|-------------------|------------------------------|
|        |               |                                     |              | Discovery Ethnicity | MAF       | MA | p-value           |                              |
| 1      | rs3100865     | 1:2775967-2815967                   | T            | EA                  | 0.29      | T  | 3.95E-05          | 9.02E-06                     |
| 2      | rs7550557     | 1:216321556-216361556               | A            | CA                  | 0.05      | G  | 1.07E-03          | 3.92E-05                     |
| 3      | rs12711789    | 2:114307098-114347098               | A            | HA                  | 0.08      | A  | 1.53E-03          | 1.86E-05                     |
| 4      | rs7602149     | 2:114337038-114377038               | T            | HA                  | 0.10      | T  | 1.58E-04          | 4.78E-06                     |
| 5      | rs6710525     | 2:114392038-114432038               | A            | HA                  | 0.08      | G  | 1.35E-03          | 3.05E-05                     |
| 6      | rs13425176    | 2:114413390-114453390               | A            | HA                  | 0.08      | C  | 1.24E-03          | 2.68E-05                     |
| 7      | rs519887      | 2:169469131-169509131               | T            | HA                  | 0.46      | C  | 8.61E-05          | 3.00E-05                     |
| 8      | rs853772      | 2:169502901-169542901               | T            | HA                  | 0.48      | T  | 9.92E-05          | 4.48E-05                     |
| 9      | rs12692904    | 2:169992063-170032063               | T            | EA                  | 0.23      | C  | 1.88E-03          | 4.06E-05                     |
| 10     | rs13001068    | 2:182686602-182726602               | A            | HA                  | 0.06      | G  | 1.06E-04          | 6.95E-06                     |
| 11     | rs1569108     | 2:183196291-183236291               | T            | AA                  | 0.46      | C  | 1.97E-03          | 5.01E-05                     |
| 12     | SNP_A-1966287 | 2:191557187-191597187               | T            | HA                  | 0.11      | T  | 2.97E-05          | 4.57E-06                     |
| 13     | rs4389282     | 2:192565881-192605881               | T            | EA                  | 0.08      | T  | 1.10E-03          | 4.30E-05                     |
| 14     | rs6802476     | 3:151302625-151342625               | C            | HA                  | 0.09      | G  | 1.50E-04          | 5.01E-05                     |
| 15     | rs3796972     | 4:104755240-104795240               | A            | EA                  | 0.32      | C  | 2.02E-06          | 4.89E-06                     |
| 16     | rs233976      | 4:104803918-104843918               | A            | EA                  | 0.17      | A  | 1.90E-04          | 1.34E-05                     |
| 17     | rs2726516     | 4:106545655-106585655               | A            | EA                  | 0.43      | A  | 1.21E-04          | 3.58E-05                     |
| 18     | rs13130595    | 4:177364585-177404585               | T            | CA                  | 0.25      | C  | 2.52E-03          | 3.93E-05                     |
| 19     | rs9467173     | 6:24547252-24587252                 | T            | EA                  | 0.46      | T  | 1.02E-03          | 2.71E-05                     |
| 20     | rs4626500     | 7:5353108-5393108                   | A            | AA                  | 0.11      | A  | 1.46E-03          | 1.30E-05                     |
| 21     | rs697521      | 7:16710681-16750681                 | T            | AA/HA               | 0.18/0.09 | G  | 1.01E-03/6.09E-04 | 2.12E-06                     |

|    |            |                        |   |    |      |   |          |          |
|----|------------|------------------------|---|----|------|---|----------|----------|
| 22 | rs10234941 | 7:42452470-42492470    | T | AA | 0.14 | T | 1.44E-03 | 1.33E-05 |
| 23 | rs11771332 | 7:86519742-86559742    | A | HA | 0.11 | T | 1.54E-04 | 2.52E-05 |
| 24 | rs13271255 | 8:5383703-5423703      | T | EA | 0.11 | C | 1.39E-03 | 2.98E-05 |
| 25 | rs4273841  | 8:59034140-59074140    | C | HA | 0.18 | G | 3.27E-04 | 1.45E-05 |
| 26 | rs7350109  | 8:60733909-60773909    | A | EA | 0.25 | T | 6.85E-06 | 6.88E-06 |
| 27 | rs4360284  | 8:60771439-60811439    | C | EA | 0.26 | G | 1.25E-05 | 6.89E-06 |
| 28 | rs9643512  | 8:60810808-60850808    | T | EA | 0.26 | T | 8.53E-05 | 2.41E-05 |
| 29 | rs1377249  | 8:78208511-78248511    | A | AA | 0.24 | C | 1.22E-03 | 1.97E-05 |
| 30 | rs17148529 | 10:10685682-10725682   | T | AA | 0.14 | T | 4.94E-04 | 2.83E-05 |
| 31 | rs17620681 | 10:54883832-54923832   | T | EA | 0.22 | C | 1.91E-03 | 1.83E-05 |
| 32 | rs1159612  | 10:85299038-85339038   | T | AA | 0.11 | T | 1.13E-03 | 2.87E-05 |
| 33 | rs11015985 | 10:129649308-129689308 | T | EA | 0.21 | C | 8.33E-04 | 1.21E-05 |
| 34 | rs1448128  | 11:121271660-121311660 | C | EA | 0.19 | C | 3.74E-05 | 4.61E-06 |
| 35 | rs1863838  | 12:9183291-9223291     | T | AA | 0.23 | G | 3.14E-05 | 4.84E-05 |
| 36 | rs776896   | 12:39714697-39754697   | A | HA | 0.17 | A | 1.16E-03 | 3.20E-05 |
| 37 | rs2229774  | 12:51871812-51911812   | A | EA | 0.07 | A | 3.30E-04 | 1.04E-05 |
| 38 | rs1765856  | 13:33802221-33842221   | A | EA | 0.28 | G | 9.06E-04 | 2.45E-05 |
| 39 | rs9560521  | 13:89437392-89477392   | A | EA | 0.09 | A | 1.03E-03 | 1.92E-05 |
| 40 | rs9323096  | 14:43747537-43787537   | A | CA | 0.09 | A | 2.98E-03 | 4.92E-05 |
| 41 | rs10149069 | 14:43786179-43826179   | A | CA | 0.09 | G | 1.58E-03 | 2.22E-05 |
| 42 | rs3784589  | 15:29062006-29102006   | A | EA | 0.06 | A | 2.59E-04 | 3.89E-05 |
| 43 | rs12148583 | 15:64262685-64302685   | A | CA | 0.47 | T | 9.93E-06 | 1.66E-05 |
| 44 | rs729650   | 15:77126365-77166365   | T | AA | 0.11 | C | 3.68E-04 | 4.51E-05 |
| 45 | rs8046816  | 16:71843525-71883525   | A | AA | 0.43 | C | 5.16E-04 | 3.83E-05 |
| 46 | rs2728505  | 18:21454070-21494070   | A | HA | 0.40 | C | 5.76E-04 | 2.27E-05 |
| 47 | rs4140486  | 22:23660087-23700087   | A | HA | 0.20 | G | 1.73E-03 | 6.28E-06 |

chr: chromosome, bp: basepairs, MAF: minor allele frequency, MA: minor allele, CES-D: Center for Epidemiologic Sciences – Depression score, AA: African American, EA: European American, CA: Chinese American, HA: Hispanic American
