# Supplementary material
Source: PubMed Central journal article supplement (PMC4720563)
Supplement: NIHMS714490-supplement-10519_2015_9734_MOESM3_ESM.pdf [file NIHMS714490-supplement-10519_2015_9734_MOESM3_ESM.pdf]

Applying novel methods for assessing individual- and neighborhood-level social and psychosocial environment interactions with genetic factors in the prediction of depressive symptoms in the Multi-Ethnic Study of Atherosclerosis. *Behavior Genetics*. Erin B. Ware, Jennifer A. Smith, Bhramar Mukherjee, Seunggeun Lee, Sharon L. R. Kardia, Ana V. Diez-Roux

**Corresponding author:** Erin Ware<sup>1,2</sup>

**Email:** ebakshis@umich.edu

<sup>1</sup>Institute for Social Research, University of Michigan, Ann Arbor, MI

<sup>2</sup>Department of Epidemiology, School of Public Health, University of Michigan, Ann Arbor, MI

### Online Resource 3

Sequence Kernel Association Testing and Meta-analysis results for the 47 regions identified from the individual-SNP based GWAS of averaged depressive symptom score in the Multi-Ethnic Study of Atherosclerosis(Ware et al., 2015)

| Region | Chr | SKAT(AA) |                  | SKAT(EA) |                  | SKAT(CA) |                  | SKAT(HA) |                  | MetaSKAT | Genes within $\pm 100$ kb of index SNP <sup>a</sup> |
|--------|-----|----------|------------------|----------|------------------|----------|------------------|----------|------------------|----------|-----------------------------------------------------|
|        |     | p-value  | n <sub>SNP</sub> | p-value  |                                                     |
| 1      | 1   | 8.80E-01 | 18               | 1.60E-04 | 19               | 6.55E-01 | 20               | 1.56E-01 | 22               | 7.71E-03 | -                                                   |
| 2      | 1   | 1.98E-01 | 47               | 1.93E-01 | 43               | 9.86E-02 | 41               | 7.43E-01 | 46               | 1.96E-01 | -                                                   |
| 3      | 2   | 2.28E-01 | 53               | 7.66E-03 | 41               | 1.34E-01 | 40               | 6.61E-02 | 53               | 4.27E-02 | (ACTR3)                                             |
| 4      | 2   | 3.62E-01 | 43               | 8.31E-02 | 35               | 1.69E-01 | 33               | 9.29E-02 | 43               | 6.16E-03 | ACTR3                                               |
| 5      | 2   | 4.47E-01 | 38               | 2.37E-02 | 32               | 1.33E-01 | 32               | 1.50E-01 | 38               | 4.14E-02 | ACTR3                                               |
| 6      | 2   | 3.11E-01 | 50               | 1.66E-02 | 44               | 7.50E-02 | 41               | 1.90E-01 | 50               | 1.58E-02 | ACTR3                                               |
| 7      | 2   | 1.15E-01 | 76               | 1.33E-01 | 63               | 5.60E-01 | 56               | 5.95E-05 | 75               | 4.07E-03 | (ABCB11)                                            |
| 8      | 2   | 2.22E-01 | 56               | 2.70E-01 | 52               | 8.09E-01 | 45               | 2.93E-04 | 55               | 1.35E-02 | G6PC2, (ABCB11)                                     |
| 9      | 2   | 1.16E-01 | 55               | 7.59E-03 | 59               | 1.77E-02 | 49               | 3.44E-01 | 56               | 3.41E-03 | (BBS5)                                              |
| 10     | 2   | 9.34E-01 | 72               | 5.36E-02 | 63               | 1.70E-01 | 57               | 2.13E-02 | 71               | 3.36E-02 | (PPP1R1C, PDE1A)                                    |
| 11     | 2   | 8.09E-03 | 58               | 1.66E-02 | 57               | 9.38E-01 | 49               | 1.08E-01 | 55               | 2.08E-03 | -                                                   |
| 12     | 2   | 6.09E-01 | 45               | 8.56E-01 | 38               | 3.51E-01 | 35               | 3.40E-03 | 42               | 2.11E-01 | STAT1, (STAT4)                                      |
| 13     | 2   | 4.04E-01 | 20               | 9.69E-02 | 20               | 1.24E-01 | 18               | 4.84E-01 | 25               | 1.72E-01 | TMEFF2                                              |
| 14     | 3   | 1.73E-01 | 93               | 1.07E-01 | 89               | 5.73E-01 | 89               | 3.44E-02 | 94               | 4.42E-02 | -                                                   |
| 15     | 3   | 7.40E-01 | 34               | 7.65E-03 | 33               | 6.92E-01 | 30               | 7.25E-02 | 36               | 5.16E-01 | TACR3                                               |
| 16     | 4   | 6.60E-01 | 42               | 1.21E-01 | 30               | 6.57E-01 | 30               | 1.89E-01 | 42               | 1.89E-01 | TACR3                                               |
| 17     | 4   | 7.47E-01 | 57               | 2.31E-04 | 54               | 6.79E-01 | 45               | 2.70E-01 | 57               | 1.40E-03 | PPA2, (EEF1A1P9)                                    |
| 18     | 4   | 4.66E-02 | 73               | 2.44E-01 | 67               | 1.07E-02 | 60               | 2.15E-01 | 77               | 3.40E-01 | ASB5, (SPATA4)                                      |
| 19     | 4   | 2.50E-02 | 84               | 2.88E-04 | 77               | 1.34E-01 | 79               | 9.36E-01 | 85               | 1.71E-04 | GPLD1, (MRS2, ALDH5A1)                              |
| 20     | 6   | 5.03E-02 | 9                | 4.43E-01 | 12               | 1.41E-01 | 8                | 3.01E-02 | 11               | 8.19E-02 | TNRC18                                              |
| 21     | 7   | 3.07E-01 | 58               | 3.00E-02 | 70               | 5.11E-01 | 54               | 2.24E-02 | 73               | 8.12E-03 | (BZW2, TSPAN13)                                     |
| 22     | 7   | 1.42E-02 | 75               | 1.48E-01 | 77               | 5.84E-01 | 54               | 7.67E-01 | 74               | 6.61E-02 | -                                                   |
| 23     | 7   | 2.90E-02 | 48               | 1.12E-01 | 49               | 7.75E-01 | 42               | 2.03E-01 | 47               | 2.76E-02 | KIA13242                                            |

|    |    |          |     |          |       |          |    |          |     |          |                                    |
|----|----|----------|-----|----------|-------|----------|----|----------|-----|----------|------------------------------------|
| 24 | 7  | 8.76E-03 | 129 | 1.52E-01 | 120   | 4.21E-01 | 97 | 8.59E-01 | 127 | 6.95E-02 | -                                  |
| 25 | 8  | 4.09E-01 | 34  | 5.92E-01 | 23    | 3.25E-01 | 21 | 4.88E-02 | 34  | 3.25E-01 | FAM110B                            |
| 26 | 8  | 5.31E-02 | 35  | 1.62E-04 | 18    | 9.04E-02 | 28 | 1.15E-01 | 36  | 1.17E-04 | -                                  |
| 27 | 8  | 3.71E-01 | 41  | 1.26E-04 | 25    | 1.31E-01 | 30 | 1.62E-01 | 42  | 9.69E-05 | -                                  |
| 28 | 8  | 5.98E-01 | 54  | 5.96E-04 | 45    | 3.03E-01 | 45 | 4.76E-01 | 54  | 7.47E-04 | -                                  |
| 29 | 8  | 4.54E-02 | 65  | 9.25E-02 | 60    | 1.87E-01 | 56 | 2.84E-01 | 65  | 4.31E-02 | -                                  |
| 30 | 8  | 1.17E-02 | 79  | 6.54E-01 | 74    | 9.12E-01 | 68 | 4.25E-01 | 80  | 1.39E-01 | -                                  |
| 31 | 10 | 8.64E-01 | 70  | 4.27E-01 | 59    | 4.83E-01 | 31 | 8.55E-01 | 72  | 6.60E-01 | -                                  |
| 32 | 10 | 2.56E-01 | 69  | 3.07E-01 | 71    | 5.51E-01 | 65 | 4.97E-02 | 69  | 1.63E-01 | -                                  |
| 33 | 10 | 1.04E-01 | 47  | 2.07E-02 | 57    | 8.17E-01 | 43 | 4.29E-01 | 56  | 3.25E-02 | PTPRE                              |
| 34 | 10 | 4.40E-03 | 52  | 3.02E-02 | 45    | 2.55E-01 | 44 | 1.11E-01 | 52  | 3.23E-03 | -                                  |
| 35 | 11 | 5.38E-02 | 51  | 2.72E-01 | 47    | 5.44E-01 | 41 | 3.26E-01 | 50  | 1.44E-01 | P2P                                |
| 36 | 12 | 3.36E-01 | 65  | 5.20E-01 | 44    | 6.21E-01 | 60 | 2.34E-01 | 64  | 5.28E-01 | CNTN1                              |
| 37 | 12 | 6.30E-01 | 23  | 8.44E-02 | 23    | 6.80E-01 | 18 | 4.79E-01 | 24  | 2.77E-01 | ITGB7, RARG, (CSAD, ZNF740, MFSD5) |
| 38 | 12 | 4.81E-01 | 94  | 3.37E-02 | 85    | 2.78E-01 | 78 | 2.52E-01 | 94  | 4.35E-02 | -                                  |
| 39 | 13 | 3.67E-01 | 51  | 2.38E-01 | 49    | 9.42E-01 | 37 | 4.38E-01 | 50  | 3.63E-01 | -                                  |
| 40 | 13 | 3.86E-01 | 31  | 5.08E-02 | 31    | 5.32E-03 | 27 | 1.57E-01 | 32  | 1.02E-02 | -                                  |
| 41 | 14 | 8.43E-01 | 54  | 4.46E-02 | 56    | 4.47E-03 | 47 | 2.23E-01 | 53  | 3.07E-02 | -                                  |
| 42 | 14 | 8.85E-03 | 33  | 4.27E-02 | 32    | 7.42E-01 | 29 | 5.01E-01 | 34  | 1.72E-02 | TRPM1, MTMR10, (MIR211)            |
| 43 | 15 | 1.70E-04 | 65  | 3.40E-01 | 68.00 | 3.59E-04 | 63 | 5.08E-01 | 68  | 1.18E-03 | MEGF11                             |
| 44 | 15 | 3.63E-02 | 35  | 6.88E-02 | 32    | 3.48E-01 | 30 | 7.49E-01 | 37  | 3.00E-02 | RASGRF1                            |
| 45 | 16 | 1.52E-01 | 48  | 3.43E-01 | 42    | 2.23E-01 | 31 | 2.66E-01 | 46  | 2.23E-01 | -                                  |
| 46 | 18 | 7.47E-02 | 52  | 1.95E-01 | 44    | 7.33E-01 | 44 | 2.06E-02 | 53  | 3.74E-02 | -                                  |
| 47 | 22 | 7.34E-01 | 28  | 1.10E-01 | 26    | 1.08E-02 | 24 | 1.09E-02 | 31  | 2.31E-02 | TMEM211, (SGSM1)                   |

Models adjusted for age, sex, site, and adult socioeconomic position

SKAT: Sequence Kernel Association Test, Chr: chromosome, n: number of SNPs in analysis, AA: African American, EA: European American, CA: Chinese American, HA: Hispanic American. <sup>a</sup>Parentheses indicate the region is not within the gene listed
